# Supplementary material for: Antineoplastic Effects of siRNA against TMPRSS2-ERG Junction Oncogene in Prostate Cancer
Source: PLOS journal article supplement (doi:10.1371/journal.pone.0125277), 2015-05-01
Supplement: S6 (10.1371/journal.pone.0125277.s006) [file journal.pone.0125277.s006]

**S2 Fig.**

Inhibitory effects of the combination of siRNAs TMPRSS2-ERG III and IV on cell viability.

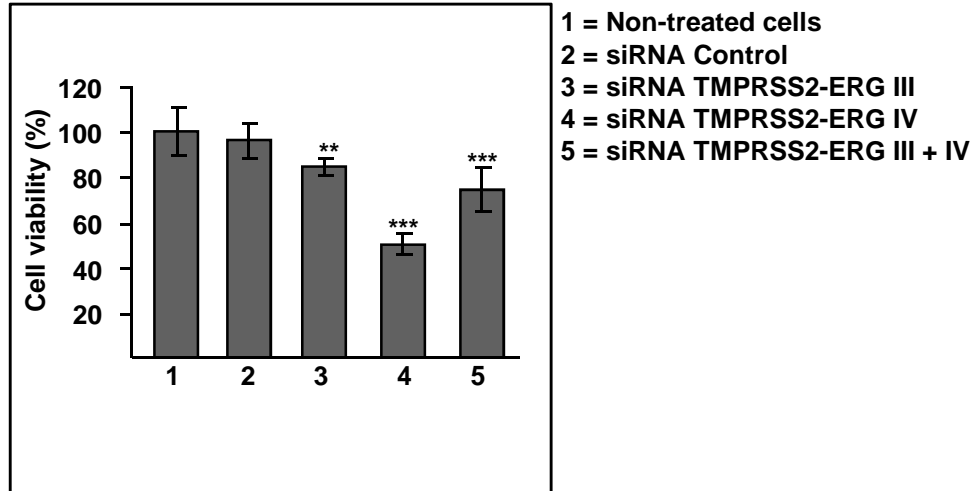

VCaP cells were transfected for 72h with siRNAs alone (TMPRSS2-ERG III, IV and Control) or in combination (TMPRSS2-ERG III + IV) at 50nM concentration and the MTT viability assay was performed. The number of viable cells was measured and compared to non-treated cells incubated with transfecting agent only (100% cell viability). Results are the mean  $\pm$  SD of 2 independent experiments containing 8 replicates for each condition. Statistical analysis (Kruskal & Wallis followed by Tukey and Dunnet test) was performed to assess the difference between treatments compared to non-treated cells. \*\*= $p<0.01$ ; \*\*\*= $p<0.001$ .
